# Supplementary material
Source: PubMed Central journal article supplement (PMC7954524)
Supplement: NIHMS1554018-supplement-1.pdf [file NIHMS1554018-supplement-1.pdf]

**APPENDIX 1: Percent of target symptomatic bone metastases categorized as “complicated,” calculated across all possible definitions for complicated bone metastases using the 8 variables listed.**

| Prior RT | Prior surgery | All fracture | Non-spine fracture only | All neuraxis compromise | CCS only | CE only | Soft tissue component | Percent of “complicated” cases |
|----------|---------------|--------------|-------------------------|-------------------------|----------|---------|-----------------------|--------------------------------|
| ✓        | ✓             | ✓            |                         | ✓                       |          |         | ✓                     | 67.3%                          |
| ✓        | ✓             | ✓            |                         |                         | ✓        |         | ✓                     | 66.8%                          |
|          | ✓             | ✓            |                         | ✓                       |          |         | ✓                     | 65.9%                          |
|          | ✓             | ✓            |                         |                         | ✓        |         | ✓                     | 65.3%                          |
| ✓        | ✓             | ✓            |                         |                         |          | ✓       | ✓                     | 62.0%                          |
| ✓        | ✓             | ✓            |                         |                         |          |         | ✓                     | 61.8%                          |
| ✓        | ✓             |              | ✓                       | ✓                       |          |         | ✓                     | 61.8%                          |
| ✓        | ✓             |              | ✓                       |                         | ✓        |         | ✓                     | 61.1%                          |
|          | ✓             | ✓            |                         |                         |          | ✓       | ✓                     | 60.2%                          |
|          | ✓             |              | ✓                       | ✓                       |          |         | ✓                     | 60.2%                          |
|          | ✓             | ✓            |                         |                         |          |         | ✓                     | 60.1%                          |
| ✓        | ✓             |              |                         | ✓                       |          |         | ✓                     | 59.5%                          |
|          | ✓             |              | ✓                       |                         | ✓        |         | ✓                     | 59.2%                          |
| ✓        |               | ✓            |                         | ✓                       |          |         | ✓                     | 58.7%                          |
| ✓        | ✓             |              |                         |                         | ✓        |         | ✓                     | 58.5%                          |
| ✓        |               | ✓            |                         |                         | ✓        |         | ✓                     | 58.2%                          |
|          | ✓             |              |                         | ✓                       |          |         | ✓                     | 57.4%                          |
|          |               | ✓            |                         | ✓                       |          |         | ✓                     | 57.0%                          |
|          | ✓             |              |                         |                         | ✓        |         | ✓                     | 56.7%                          |
|          |               | ✓            |                         |                         | ✓        |         | ✓                     | 56.4%                          |
| ✓        |               | ✓            |                         |                         |          | ✓       | ✓                     | 53.4%                          |
| ✓        |               | ✓            |                         |                         |          |         | ✓                     | 53.2%                          |
| ✓        |               |              | ✓                       | ✓                       |          |         | ✓                     | 53.2%                          |
| ✓        | ✓             |              | ✓                       |                         |          | ✓       | ✓                     | 52.9%                          |
| ✓        | ✓             |              | ✓                       |                         |          |         | ✓                     | 52.5%                          |
| ✓        |               |              | ✓                       |                         | ✓        |         | ✓                     | 52.3%                          |
|          |               | ✓            |                         |                         |          | ✓       | ✓                     | 51.3%                          |
|          |               |              | ✓                       | ✓                       |          |         | ✓                     | 51.3%                          |
|          |               | ✓            |                         |                         |          |         | ✓                     | 51.2%                          |
|          | ✓             |              | ✓                       |                         |          | ✓       | ✓                     | 50.9%                          |
| ✓        |               |              |                         | ✓                       |          |         | ✓                     | 50.6%                          |
| ✓        | ✓             |              |                         |                         |          | ✓       | ✓                     | 50.6%                          |
|          | ✓             |              | ✓                       |                         |          |         | ✓                     | 50.3%                          |
|          |               |              | ✓                       |                         | ✓        |         | ✓                     | 50.3%                          |
| ✓        | ✓             |              |                         |                         |          |         | ✓                     | 49.9%                          |
| ✓        |               |              |                         |                         | ✓        |         | ✓                     | 49.7%                          |
|          |               |              |                         | ✓                       |          |         | ✓                     | 48.5%                          |
|          | ✓             |              |                         |                         |          | ✓       | ✓                     | 48.1%                          |
| ✓        | ✓             | ✓            |                         | ✓                       |          |         |                       | 47.8%                          |
|          | ✓             |              |                         |                         |          |         | ✓                     | 47.7%                          |
|          |               |              |                         |                         | ✓        |         | ✓                     | 47.5%                          |
|          | ✓             | ✓            |                         | ✓                       |          |         |                       | 45.3%                          |
| ✓        |               |              | ✓                       |                         |          | ✓       | ✓                     | 44.3%                          |
| ✓        |               |              | ✓                       |                         |          |         | ✓                     | 44.2%                          |
| ✓        | ✓             | ✓            |                         |                         | ✓        |         |                       | 43.7%                          |
|          |               |              | ✓                       |                         |          | ✓       | ✓                     | 42.0%                          |
| ✓        |               |              |                         |                         |          | ✓       | ✓                     | 41.7%                          |

| Prior RT | Prior surgery | All fracture | Non-spine fracture only | All neuraxis compromise | CCS only | CE only | Soft tissue component | Percent of "complicated" cases |
|----------|---------------|--------------|-------------------------|-------------------------|----------|---------|-----------------------|--------------------------------|
|          |               |              | ✓                       |                         |          |         | ✓                     | 41.5%                          |
| ✓        | ✓             |              | ✓                       | ✓                       |          |         |                       | 41.5%                          |
| ✓        |               |              |                         |                         |          |         | ✓                     | 41.4%                          |
|          | ✓             | ✓            |                         |                         | ✓        |         |                       | 41.1%                          |
| ✓        |               | ✓            |                         | ✓                       |          |         |                       | 39.2%                          |
|          |               |              |                         |                         |          | ✓       | ✓                     | 39.1%                          |
|          | ✓             |              | ✓                       | ✓                       |          |         |                       | 39.1%                          |
|          |               |              |                         |                         |          |         | ✓                     | 38.6%                          |
| ✓        | ✓             |              |                         | ✓                       |          |         |                       | 37.8%                          |
|          |               | ✓            |                         | ✓                       |          |         |                       | 37.0%                          |
| ✓        | ✓             |              | ✓                       |                         | ✓        |         |                       | 36.4%                          |
| ✓        |               | ✓            |                         |                         | ✓        |         |                       | 35.6%                          |
|          | ✓             |              |                         | ✓                       |          |         |                       | 35.1%                          |
| ✓        | ✓             | ✓            |                         |                         |          | ✓       |                       | 34.3%                          |
| ✓        | ✓             | ✓            |                         |                         |          |         |                       | 33.7%                          |
| ✓        |               |              | ✓                       | ✓                       |          |         |                       | 33.1%                          |
|          | ✓             |              | ✓                       |                         | ✓        |         |                       | 32.9%                          |
|          |               | ✓            |                         |                         | ✓        |         |                       | 32.7%                          |
| ✓        | ✓             |              |                         |                         | ✓        |         |                       | 32.7%                          |
|          | ✓             | ✓            |                         |                         |          | ✓       |                       | 32.7%                          |
|          |               |              | ✓                       | ✓                       |          |         |                       | 30.6%                          |
|          | ✓             | ✓            |                         |                         |          |         |                       | 30.2%                          |
| ✓        |               |              |                         | ✓                       |          |         |                       | 30.2%                          |
|          | ✓             |              |                         |                         | ✓        |         |                       | 29.4%                          |
| ✓        |               |              | ✓                       |                         | ✓        |         |                       | 29.2%                          |
|          |               |              |                         | ✓                       |          |         |                       | 28.4%                          |
| ✓        |               | ✓            |                         |                         |          | ✓       |                       | 26.2%                          |
| ✓        |               | ✓            |                         |                         |          |         |                       | 25.4%                          |
|          |               |              | ✓                       |                         | ✓        |         |                       | 25.1%                          |
| ✓        |               |              |                         |                         | ✓        |         |                       | 24.5%                          |
|          |               | ✓            |                         |                         |          | ✓       |                       | 24.1%                          |
|          |               | ✓            |                         |                         |          |         |                       | 21.7%                          |
|          |               |              |                         |                         | ✓        |         |                       | 21.3%                          |
| ✓        | ✓             |              | ✓                       |                         |          | ✓       |                       | 20.6%                          |
| ✓        | ✓             |              | ✓                       |                         |          |         |                       | 19.1%                          |
|          | ✓             |              | ✓                       |                         |          | ✓       |                       | 16.9%                          |
| ✓        | ✓             |              |                         |                         |          | ✓       |                       | 15.3%                          |
| ✓        | ✓             |              |                         |                         |          |         |                       | 15.2%                          |
|          | ✓             |              | ✓                       |                         |          |         |                       | 13.0%                          |
|          | ✓             |              |                         |                         |          | ✓       |                       | 13.0%                          |
| ✓        |               |              | ✓                       |                         |          | ✓       |                       | 11.2%                          |
|          | ✓             |              |                         |                         |          |         |                       | 10.5%                          |
| ✓        |               |              | ✓                       |                         |          |         |                       | 8.9%                           |
| ✓        |               |              |                         |                         |          | ✓       |                       | 8.3%                           |
|          |               |              | ✓                       |                         |          | ✓       |                       | 6.6%                           |
| ✓        |               |              |                         |                         |          |         |                       | 6.4%                           |
|          |               |              | ✓                       |                         |          |         |                       | 4.4%                           |
|          |               |              |                         |                         |          | ✓       |                       | 4.1%                           |
|          |               |              |                         |                         |          |         |                       | 0.0%                           |

✓ Indicates that the selected variable was used as part of the definition for "complicated" bone metastasis

CCS= central canal stenosis, CE= cord edema, RT=radiotherapy
